# Supplementary material
Source: PubMed Central journal article supplement (PMC5499121)

LG1\_A LG1\_B

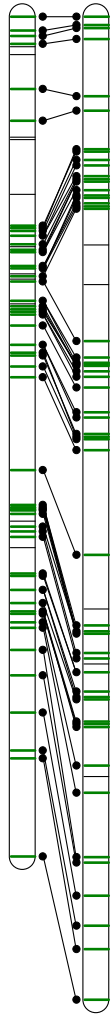

LG2\_A LG2\_B

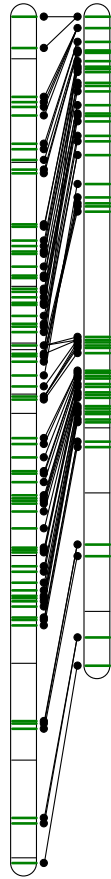

LG3\_A LG3\_B

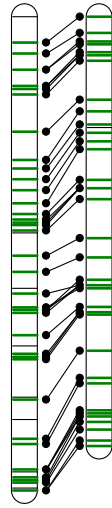

LG4\_A LG4\_B

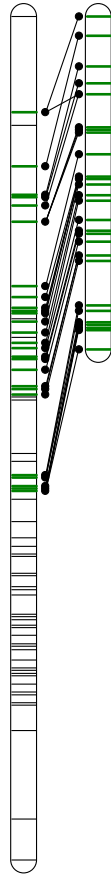

LG5\_A LG5\_B

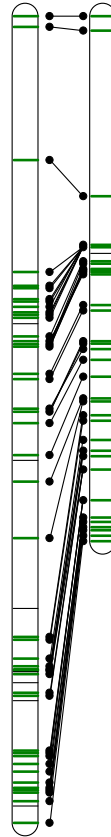

LG6\_A LG6\_B

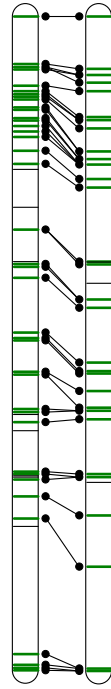

LG7\_A LG7\_B

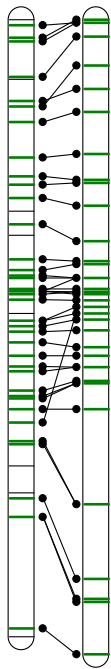

LG8\_A LG8\_B

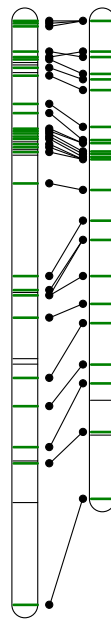

LG9\_A LG9\_B

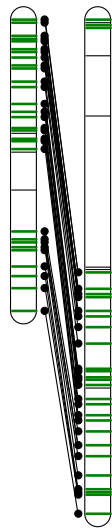

LG13\_A LG10\_A LG10\_B

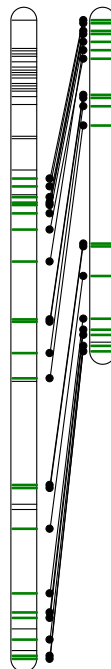

LG11\_A LG11\_B

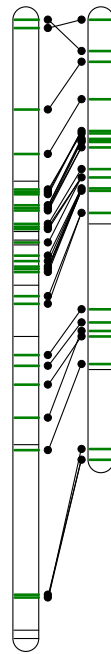

LG12\_A LG12\_B

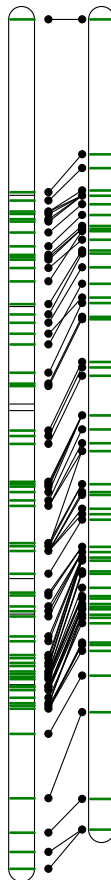

Supplement: 2115FigureS1.pdf [file 2115FigureS1.pdf]
